# Supplementary material for: A Sc–3-HF complex as a fluorescent chemosensor for the selective detection of dihydrogen phosphate
Source: Royal Society of Chemistry journal article supplement (doi:10.1039/c8ay00048d), 2018-01-01
Supplement: c8ay00048d1.pdf [file c8ay00048d1.pdf]

## A Sc-3-HF Complex as a Fluorescent Chemosensors for the Selective Detection of Dihydrogen Phosphate

Wei Du,<sup>a</sup> Chunman Jia,<sup>\*ab</sup> Yinfeng Zhang,<sup>\*c</sup> Qing Chen,<sup>a</sup> Yile Wang,<sup>a</sup> Yan Huang,<sup>d</sup> Qi Zhang<sup>\*ab</sup>

<sup>a</sup> Hainan Provincial Key Lab of Fine Chemistry, Hainan University, Haikou, Hainan 570228, China. Email: zhangqi@hainu.edu.cn; jiachunman@hainu.edu.cn.

<sup>b</sup> Key Study Center of the National Ministry of Education for Tropical Resources Utilization, Hainan University, Haikou, Hainan 570228, China.

<sup>c</sup>Department of Pathology, Johns Hopkins University School of Medicine, Baltimore, Maryland, USA. E-mail: yzhan249@jhmi.edu.

<sup>d</sup> School of Chemistry and Chemical Engineering, Jiangsu University, Zhenjiang 212013, China.

### Supporting Information

#### Table of contents

|                                                                                             |    |
|---------------------------------------------------------------------------------------------|----|
| 1. General procedure for the synthesis of compound 3-HF .....                               | S2 |
| 2. References .....                                                                         | S2 |
| 3. <sup>1</sup> H NMR and <sup>13</sup> C NMR data .....                                    | S2 |
| 4. UV-vis absorption data of 3-HF.....                                                      | S4 |
| 5. Fluorescence spectra data and HRMS data of Sc-3-HF.....                                  | S4 |
| 6. FTIR spectra data .....                                                                  | S4 |
| 7. Fluorescence spectra data and HRMS data of Al-3-HF.....                                  | S4 |
| 8. PH response of Sc-3-HF complex for H <sub>2</sub> PO <sub>4</sub> <sup>-</sup> ion ..... | S5 |
| 9. Fluorescence sensing data and UV-vis absorption data for F <sup>-</sup> ion.....         | S6 |
| 10. Fluorescence reversibility data.....                                                    | S7 |
| 11. The data of practical application .....                                                 | S8 |

## 1. General procedure for the synthesis of compound 3-HF

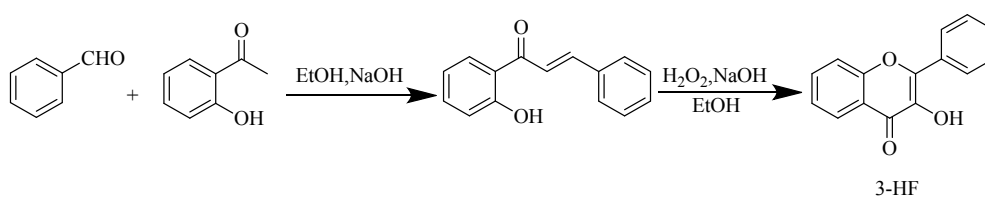

Scheme S1 The synthesis of compound 3-HF

3-HF was synthesized according to previous report<sup>1</sup>. In a 250 mL three-necked flask, 2-hydroxyacetophenone (12 mmol) and benzaldehyde (12 mmol) was dissolved in ethanol (30 mL) and warmed to 50°C, then aqueous NaOH (50%, 5.4 mL) was dropwise to the reaction mixture during 15 min. The mixture was stirred at 50°C for 4 h and then kept at room temperature for 24 h. The yellow precipitate was formed and the reaction mixture was diluted with ice-cold water (80 mL) until yellow precipitate was dissolved. The reaction mixture was neutralized with 1 M HCl, maintaining the temperature at 0°C. The precipitate was collected by filtration. Recrystallization from ethanol afforded the product 2'-hydroxychalcones, m=2.2874g, Yield=85%. And then in a 250 mL round-bottom flask, 2'-hydroxychalcones (6 mmol) was dissolved in ethanol (30 mL) and aqueous NaOH (1.2 g in 5 mL water), the reaction mixture was placed in an ice-water bath and 4 mL of 30% H<sub>2</sub>O<sub>2</sub> solution was slowly added. The reaction mixture was stirred at room temperature for 6 h. The reaction mixture was neutralized with 1 M HCl, maintaining the temperature at 0°C. The yellow precipitate was gradually formed and collected by filtration. The precipitation was dried and the crude product was recrystallized from ethanol afforded the product 3-Hydroxyflavone (3-HF), m=1.0434g, Yield=73%.

## 2. References

1) B. Liu, J. Wang, G. Zhang, R. Bai, and Y. Pang, *ACS Appl. Mater. Interfaces* 2014, 6, 4402-4407.

## 3. <sup>1</sup>H NMR and <sup>13</sup>C NMR data

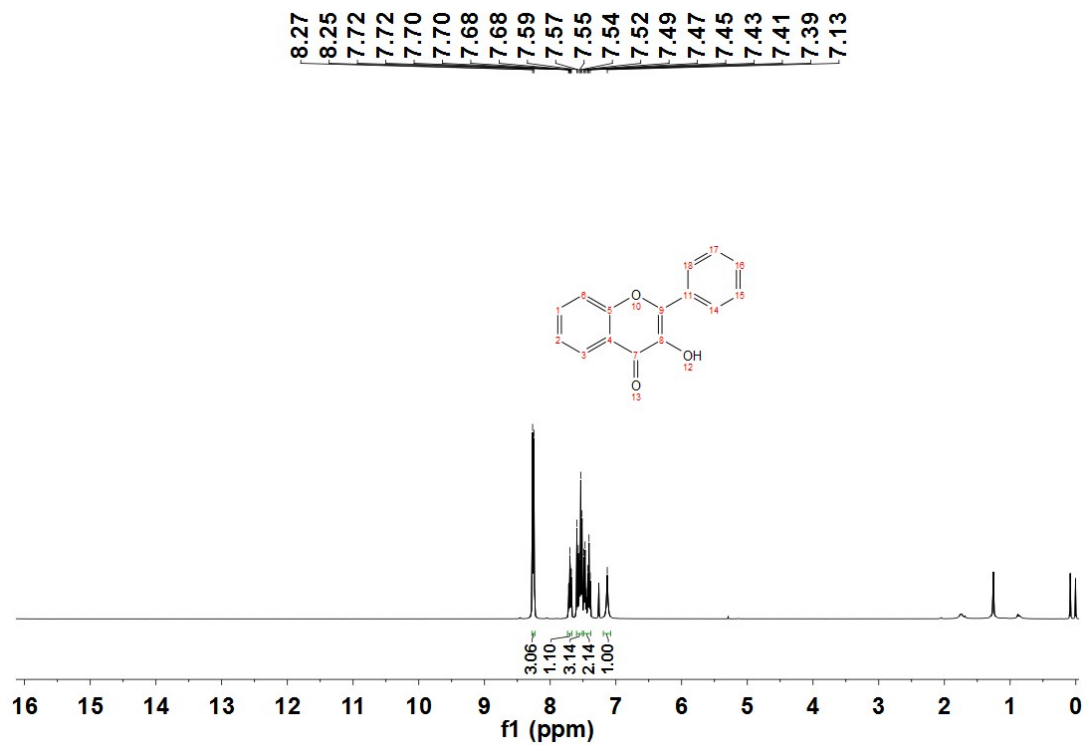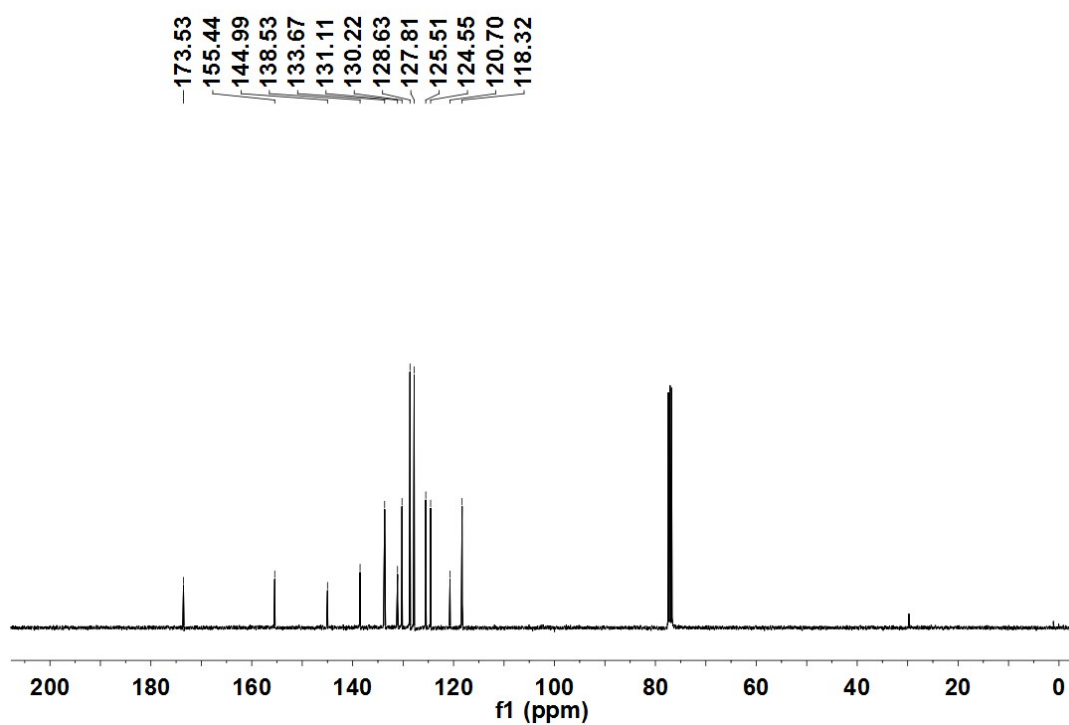

Fig. S1  $^1\text{H}$  NMR and  $^{13}\text{C}$  NMR of 3-HF

#### 4. UV-vis absorption data of 3-HF

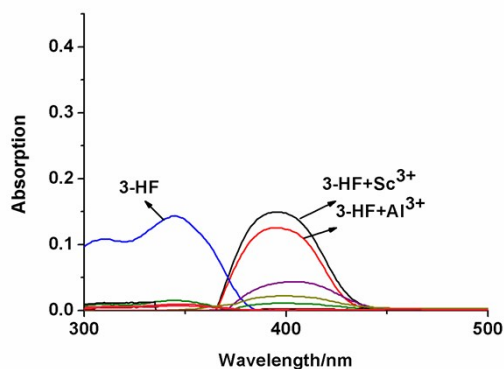

Fig.S2 The UV-vis absorption of 3-HF (10  $\mu$ M, in CH<sub>3</sub>CN) in a CH<sub>3</sub>CN–H<sub>2</sub>O (1 : 4, v/v) solution upon addition of various metal ions (10  $\mu$ M, in H<sub>2</sub>O).

#### 5. Fluorescence spectra data and HRMS data of Sc-3-HF

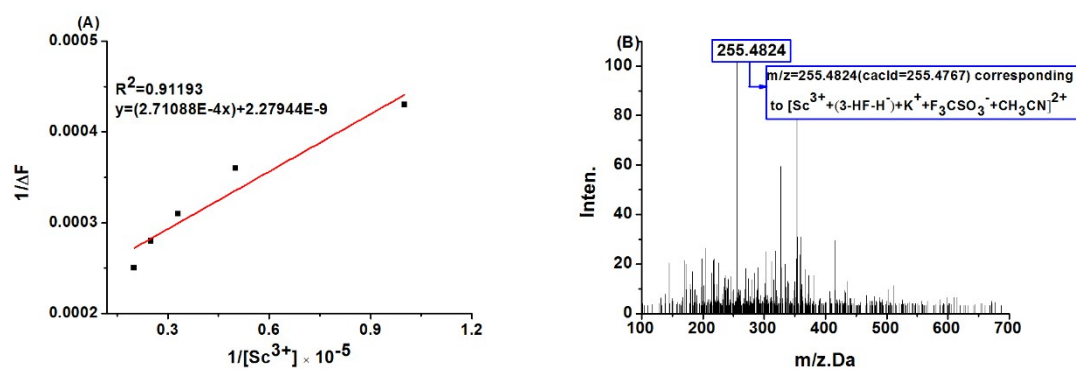

Fig. S3 (A) A linear plot of 1/ $\Delta F$  versus 1/[Sc<sup>3+</sup>]. (B) ESI mass spectrum of Sc-3-HF.

#### 6. FTIR spectra data

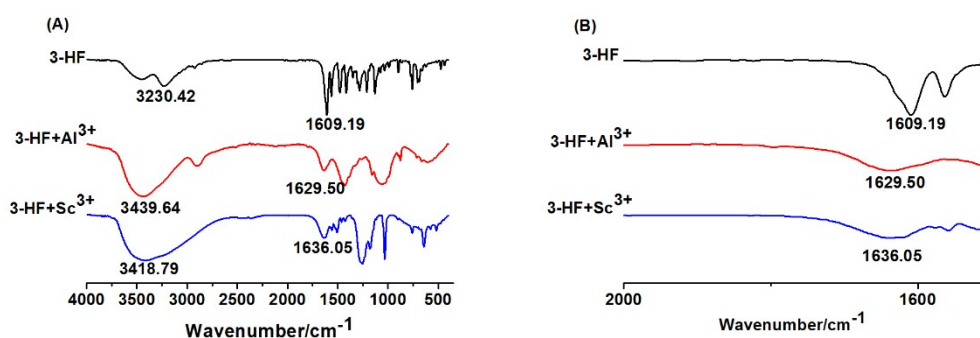

Fig. S4(A) The whole FTIR spectra of 3-HF, 3-HF–Sc<sup>3+</sup> and 3-HF–Al<sup>3+</sup> complex. (B) The 1600 region of spectra of 3-HF, 3-HF–Sc<sup>3+</sup> and 3-HF–Al<sup>3+</sup> complex.

#### 7. Fluorescence spectra data and HRMS data of Al-3-HF

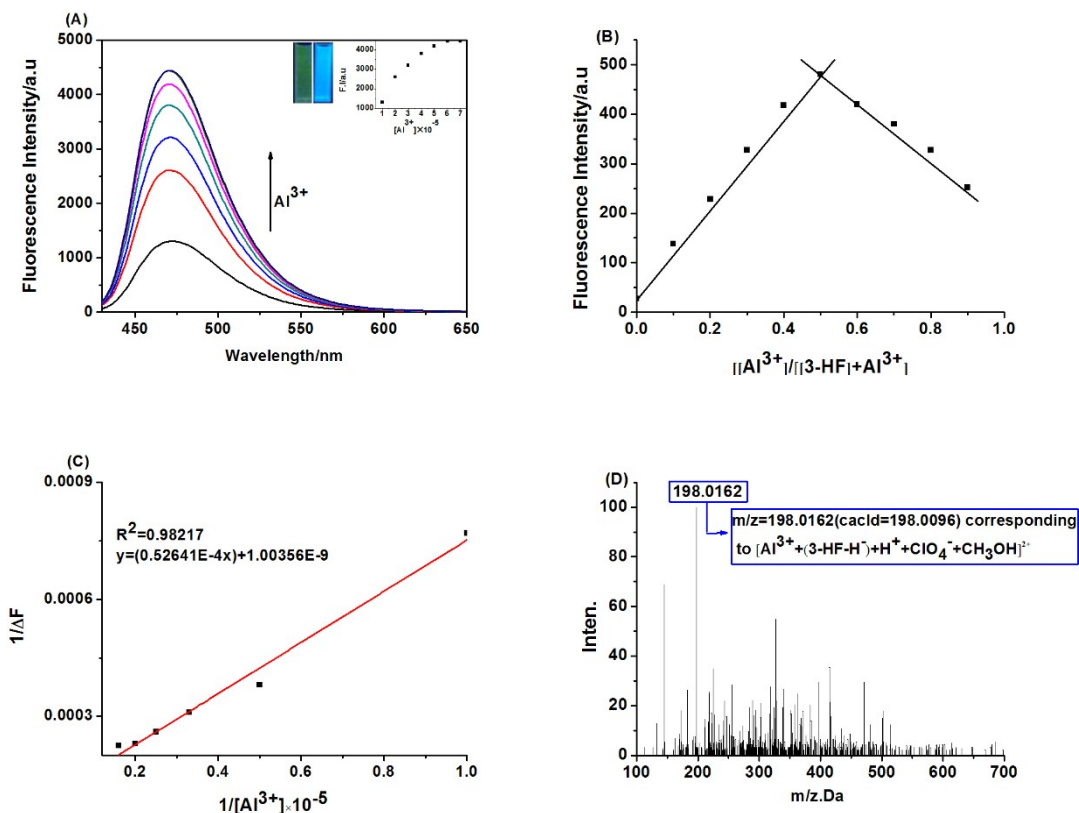

Fig. S5 (A) Titration curves of 3-HF (10  $\mu\text{M}$ , in  $\text{CH}_3\text{CN}$ ) in  $\text{CH}_3\text{CN-H}_2\text{O}$  (1 : 4, v/v) solution upon addition of  $\text{Al}(\text{ClO}_4)_3 \cdot 9\text{H}_2\text{O}$  (0 ~ 70  $\mu\text{M}$ , in  $\text{H}_2\text{O}$ ). Inset (left) shows the color change of the solution before (left) and after (right) the addition of  $\text{Al}^{3+}$ ; Inset (right) : plot of the fluorescence intensity at 470 nm vs.  $[\text{Al}^{3+}]$ . (B) Job's plot of the Al-3-HF complex in  $\text{CH}_3\text{CN-H}_2\text{O}$  (1 : 4, v/v) solution. The total concentration of 3-HF and  $\text{Al}^{3+}$  was 10  $\mu\text{M}$ . The fluorescence intensity was monitored at 470 nm. (C) A linear plot of  $1/\Delta F$  versus  $1/[\text{Al}^{3+}]$  and association constant of the Al-3-HF complex was  $1.9 \times 10^5 \text{ M}^{-1}$ . (D) ESI mass spectrum of Al-3-HF.

## 8. PH response of Sc-3-HF complex for $\text{H}_2\text{PO}_4^-$ ion

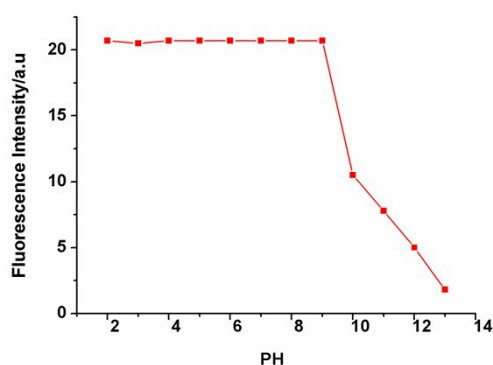

Fig.S6 pH response of the fluorescent chemsensor at the range of pH 2.0 -13.0.

## 9. Fluorescence sensing datas for F<sup>-</sup> ion

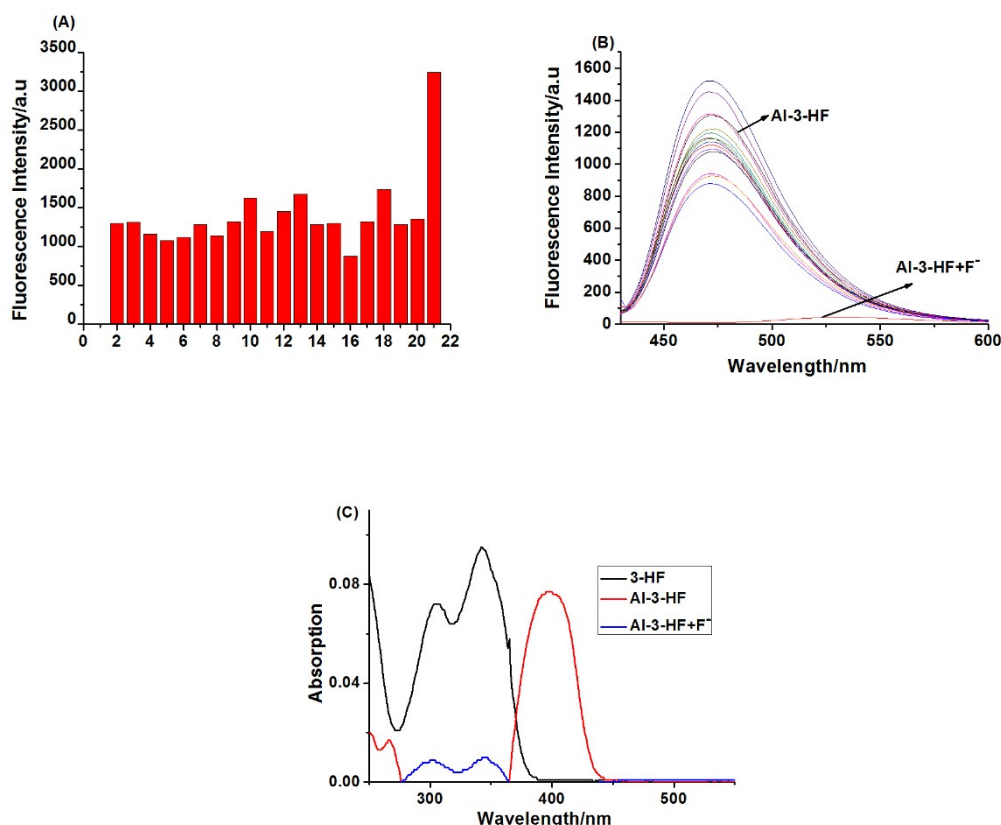

Fig. S7 (A) Fluorescence response of 3-HF (10 μM, in CH<sub>3</sub>CN) in the presence of Al<sup>3+</sup> (10 μM, in H<sub>2</sub>O) or Al<sup>3+</sup> (10 μM, in H<sub>2</sub>O) with other metal ions (M<sup>n+</sup>, 50 μM, in H<sub>2</sub>O) in a CH<sub>3</sub>CN-H<sub>2</sub>O (1 : 4, v/v) solution. (1) Blank; (2) Al<sup>3+</sup>; (3) Al<sup>3+</sup>+Co<sup>2+</sup>; (4) Al<sup>3+</sup>+ Zn<sup>2+</sup>; (5) Al<sup>3+</sup>+Pb<sup>2+</sup>; (6) Al<sup>3+</sup>+Ag<sup>+</sup>; (7) Al<sup>3+</sup> +Ni<sup>2+</sup>; (8) Al<sup>3+</sup>+La<sup>3+</sup>; (9) Al<sup>3+</sup>+Fe<sup>3+</sup>; (10) Al<sup>3+</sup> +Hg<sup>2+</sup>; (11) Al<sup>3+</sup>+Mn<sup>2+</sup>; (12) Al<sup>3+</sup>+Fe<sup>2+</sup>; (13) Al<sup>3+</sup>+Cd<sup>2+</sup>; (14) Al<sup>3+</sup>+Ca<sup>2+</sup>; (15) Al<sup>3+</sup>+Cr<sup>3+</sup>; (16) Al<sup>3+</sup>+Na<sup>+</sup>; (17) Al<sup>3+</sup> +K<sup>+</sup>; (18) Al<sup>3+</sup>+Mg<sup>2+</sup>; (19) Al<sup>3+</sup>+Cu<sup>2+</sup>; (20) Al<sup>3+</sup>+ Pd<sup>2+</sup>; (21) Al<sup>3+</sup>+Sc<sup>3+</sup>. The fluorescence intensity was monitored at 470 nm. (B) Fluorescence spectra of the Al-3-HF complex (10 μM, Al<sup>3+</sup> : 1 equiv.) in CH<sub>3</sub>CN-H<sub>2</sub>O (1 : 4, v/v) solution upon addition of various anions (50 μM, in H<sub>2</sub>O). (C) The UV-vis absorption of 3-HF (10 μM), Al-3-HF complex (10 μM), Al-3-HF complex (10 μM) + F<sup>-</sup> (1.0 equiv.).

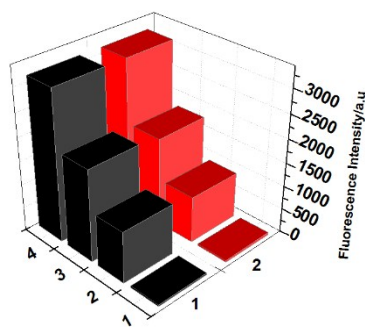

Fig. S8 Fluorescence intensity change profiles of 3-HF (10 μM, in CH<sub>3</sub>CN) in the presence of Sc<sup>3+</sup>

(10 $\mu$ M, in H<sub>2</sub>O) and Al<sup>3+</sup> (10 $\mu$ M, in H<sub>2</sub>O) with H<sub>2</sub>PO<sub>4</sub><sup>-</sup>, F<sup>-</sup> (in H<sub>2</sub>O) in CH<sub>3</sub>CN-H<sub>2</sub>O (1 : 4, v/v) solution. Left: (1,1) 3-HF+Sc<sup>3+</sup>+Al<sup>3+</sup>+F<sup>-</sup> (2.0equiv.)+ H<sub>2</sub>PO<sub>4</sub><sup>-</sup> (1.0equiv.); (1,2)3-HF+Sc<sup>3+</sup>+Al<sup>3+</sup>+F<sup>-</sup> (2.0equiv.); (1,3)3-HF+Sc<sup>3+</sup>+Al<sup>3+</sup>+F<sup>-</sup> (1.0 equiv.);(1,4)3-HF+Sc<sup>3+</sup>+Al<sup>3+</sup>. Right:(2, 1) 3-HF+Sc<sup>3+</sup>+Al<sup>3+</sup>+H<sub>2</sub>PO<sub>4</sub><sup>-</sup> (2.0equiv.) +F<sup>-</sup>(1.0 equiv.);(2, 2)3-HF+Sc<sup>3+</sup>+Al<sup>3+</sup>+H<sub>2</sub>PO<sub>4</sub><sup>-</sup> (2.0equiv.);(2,3)3-HF+Sc<sup>3+</sup>+Al<sup>3+</sup>+ H<sub>2</sub>PO<sub>4</sub><sup>-</sup> (1.0equiv.);(2,4)3-HF+Sc<sup>3+</sup>+Al<sup>3+</sup>.The fluorescence intensity was monitored around 480 nm.

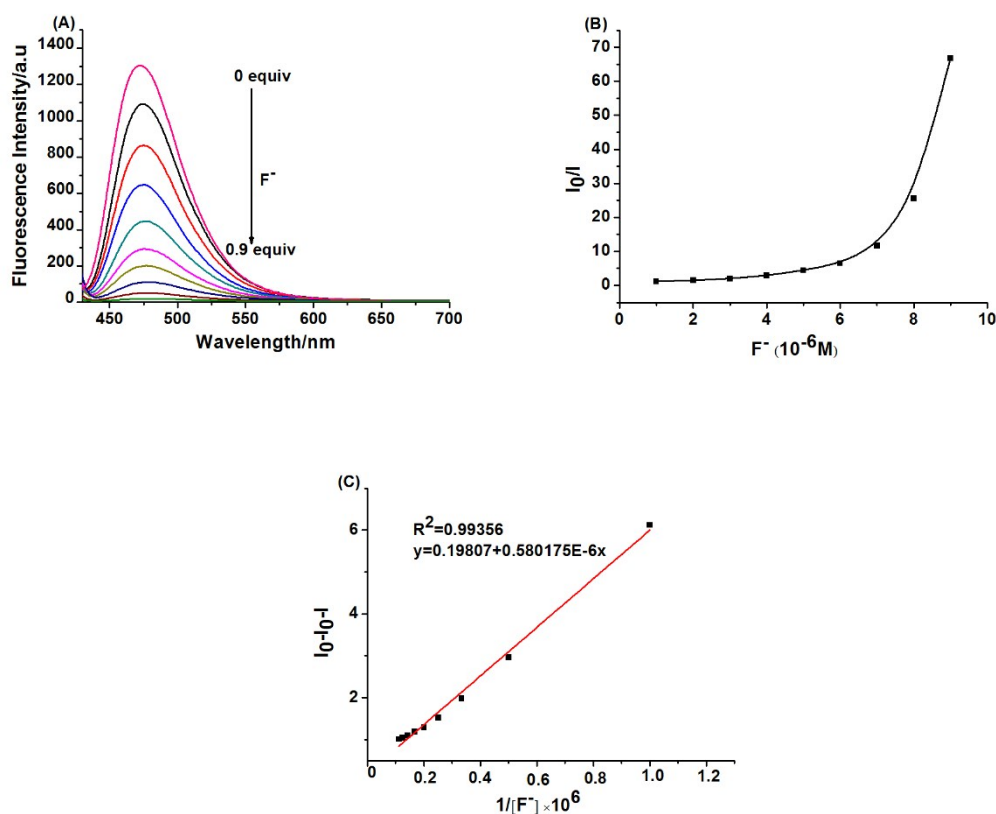

Fig. S9 (A) Titration curves of the Al-3-HF complex (10  $\mu$ M, 1 equiv. Al<sup>3+</sup>) in CH<sub>3</sub>CN-H<sub>2</sub>O (1 : 4, v/v) solution upon addition of KH<sub>2</sub>PO<sub>4</sub> (0 ~ 9  $\mu$ M, in H<sub>2</sub>O) solution. (B) A plot of I<sub>0</sub>/I versus [F<sup>-</sup>]. (C) A linear plot of I<sub>0</sub>/(I<sub>0</sub>-I) versus 1/[F<sup>-</sup>] and the binding constant was calculated to be 8.7 × 10<sup>6</sup> M<sup>-1</sup>.

## 10. Fluorescence reversibility data

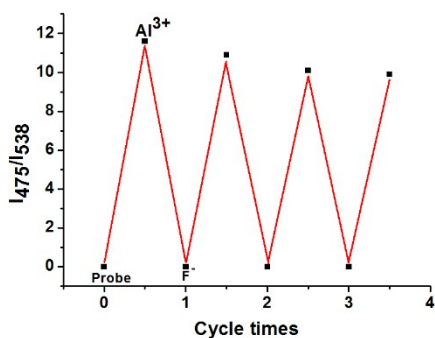

Fig. S10 Reversibility study of probe 3-HF (10  $\mu\text{M}$ ) in  $\text{CH}_3\text{CN-H}_2\text{O}$  (1 : 4, v/v) toward  $\text{Al}^{3+}$  (40  $\mu\text{M}$ ) upon addition of  $\text{F}^-$  (40  $\mu\text{M}$ ).

### 11.The data of practical application

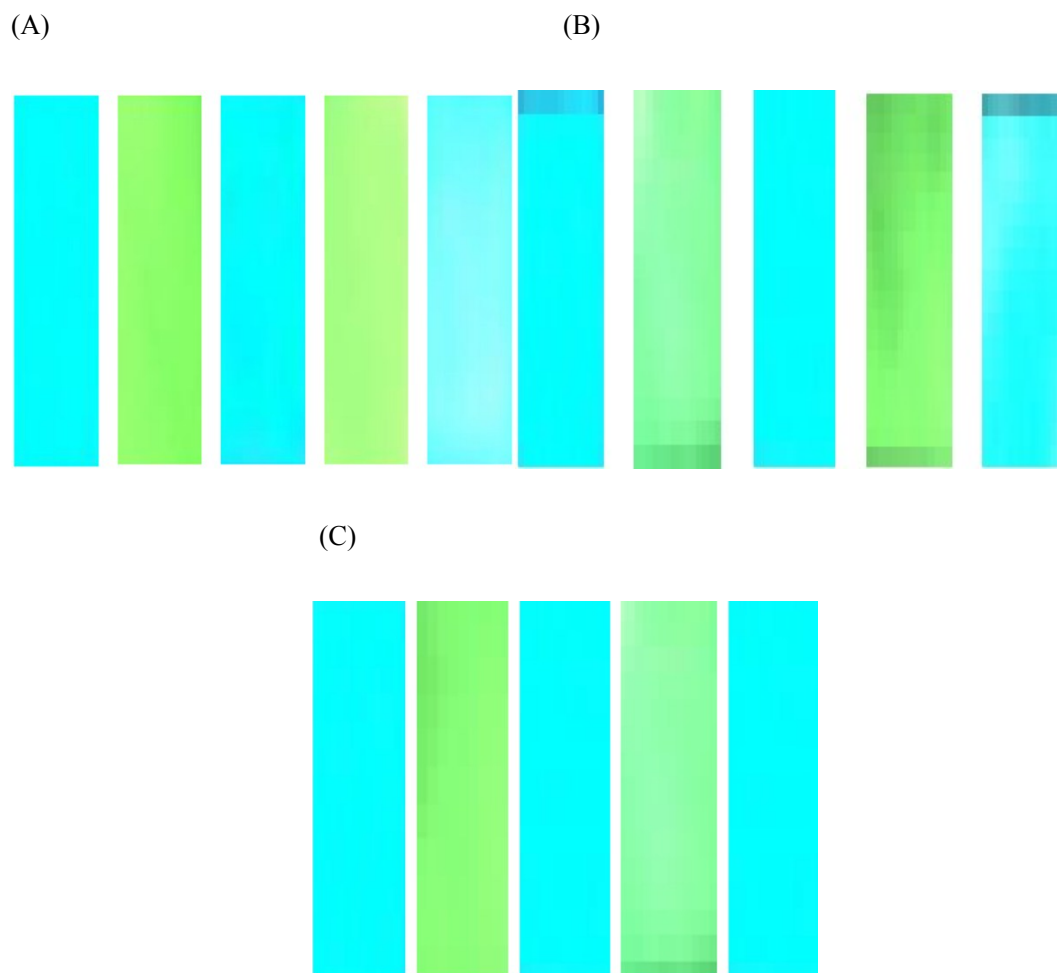

Fig.S11(A) Images of the test strips coated with Sc-3-HF for transformation among these ions. Left to right: Sc-3-HF, Sc-3-HF +  $\text{H}_2\text{PO}_4^-$ , Sc-3-HF +  $\text{H}_2\text{PO}_4^-$  +  $\text{Al}^{3+}$ , Sc-3-HF +  $\text{H}_2\text{PO}_4^-$  +  $\text{Al}^{3+}$  +  $\text{F}^-$ , Sc-3-HF +  $\text{H}_2\text{PO}_4^-$  +  $\text{Al}^{3+}$  +  $\text{F}^-$  +  $\text{Sc}^{3+}$ . (B) Images of the test strips coated with Al-3-HF for transformation between  $\text{F}^-$  and  $\text{Al}^{3+}$ . Left to right: Al-3-HF, Al-3-HF +  $\text{F}^-$ , Al-3-HF +  $\text{F}^-$  +  $\text{Al}^{3+}$ , Al-3-HF +  $\text{F}^-$  +  $\text{Al}^{3+}$  +  $\text{F}^-$ , Al-3-HF +  $\text{F}^-$  +  $\text{Al}^{3+}$  +  $\text{F}^-$  +  $\text{Al}^{3+}$ . (C) Images of the test strips coated with Al-3-HF for transformation among these ions. Left to right: Al-3-HF, Al-3-HF +  $\text{F}^-$ , Al-3-HF +  $\text{F}^-$  +  $\text{Sc}^{3+}$ , Al-3-HF +  $\text{F}^-$  +  $\text{Sc}^{3+}$  +  $\text{H}_2\text{PO}_4^-$ , Al-3-HF +  $\text{F}^-$  +  $\text{Sc}^{3+}$  +  $\text{H}_2\text{PO}_4^-$  +  $\text{Al}^{3+}$ .
